# Supplementary material
Source: PubMed Central journal article supplement (PMC7295523)
Supplement: mmc1.pdf [file mmc1.pdf]

# Long-Range Air Pollution Transport in East Asia During the First Week of the COVID-19 Lockdown in China

## Supporting Information

Stephen Miles Griffith<sup>a,\*</sup>, Wei-Syun Huang<sup>a</sup>, Chia-Ching Lin<sup>b</sup>, Ying-Chieh Chen<sup>b</sup>, Kuo-En Chang<sup>c</sup>, Tang-Huang Lin<sup>c</sup>, Sheng-Hsiang Wang<sup>a</sup>, Neng-Huei Lin<sup>a,b\*</sup>

<sup>a</sup>Department of Atmospheric Sciences, National Central University, Taoyuan, 32001, Taiwan

<sup>b</sup>Center for Environmental Monitoring and Technology, National Central University, Taoyuan, 32001, Taiwan

<sup>c</sup>Center for Space and Remote Sensing Research, National Central University, Taoyuan, 32001, Taiwan

\* Corresponding authors at: Department of Atmospheric Sciences, National Central University, 300 Zhongda Road, Taoyuan, 32001, Taiwan. Email addresses: [stegriff88@gmail.com](mailto:stegriff88@gmail.com) (S. M. Griffith), [nhlin@cc.ncu.edu.tw](mailto:nhlin@cc.ncu.edu.tw) (N.-H. Lin)

## Contents of this file

Fig. S1: Surface chart and back-trajectories for the 02/01/2018 LRT event arriving to Taiwan.

Fig. S2: Lidar data from northern Taiwan during the two episodes analyzed in this study.

Fig. S3: Average OMI NO<sub>2</sub> in the days preceding the 02/01/2018 LRT event arriving to Taiwan

Fig. S4: Average VIIRS AOD in the days preceding the a) 02/01/2018 LRT event and the b) 2020 CNY Week 3 LRT event arriving to Taiwan

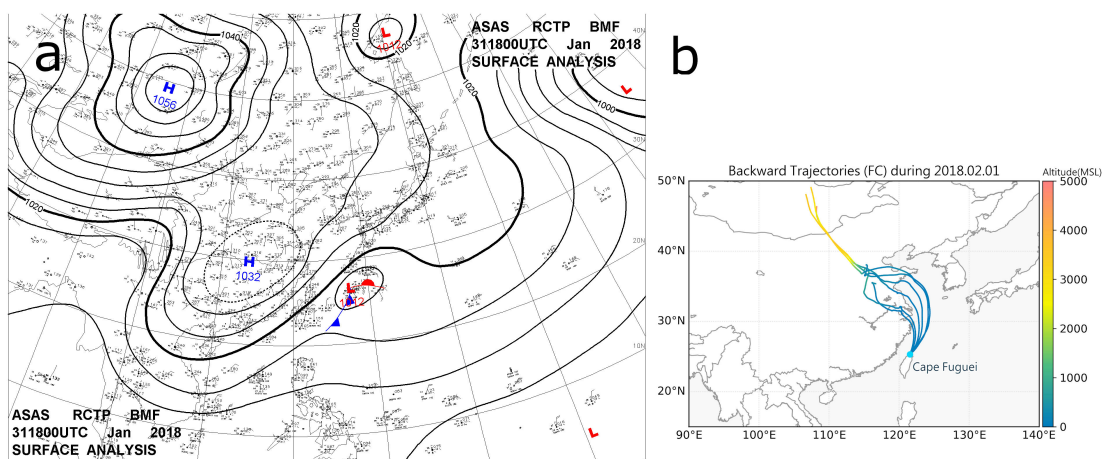

Figure S1: a) Surface chart and b) back-trajectories for the LRT event that occurred on 2/1/2018, arriving at a 100 m height every 8 hrs at Cape Fuguei in Taiwan

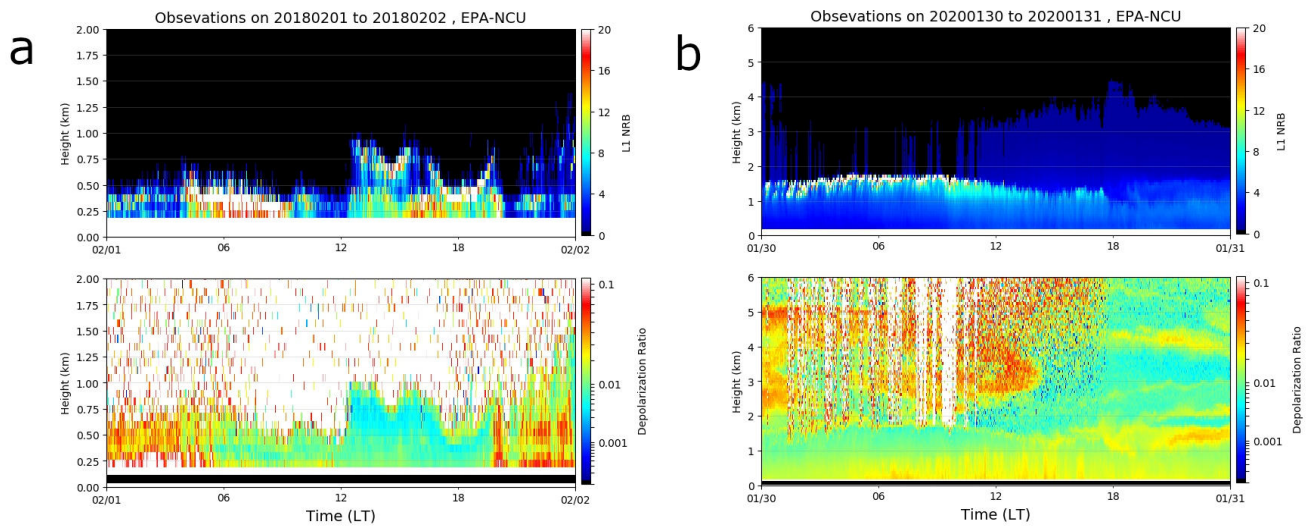

Figure S2: Lidar data from northern Taiwan during the a) 02/01/2018 LRT event and the b) 2020 CNY Week 3 LRT event arrival to Taiwan (accessed via <http://lidar.atm.ncu.edu.tw>)

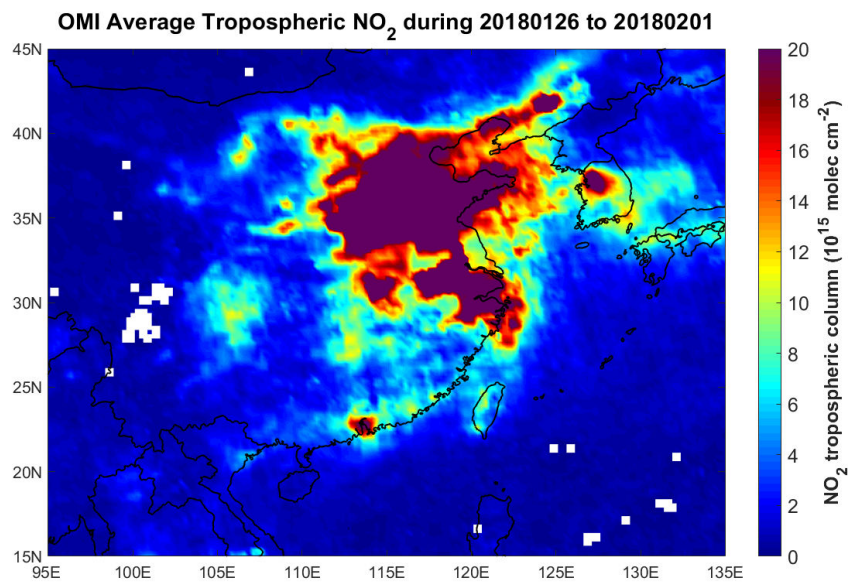

Fig. S3: Average OMI NO<sub>2</sub> in the days preceding the 02/01/2018 LRT event arriving to Taiwan

a

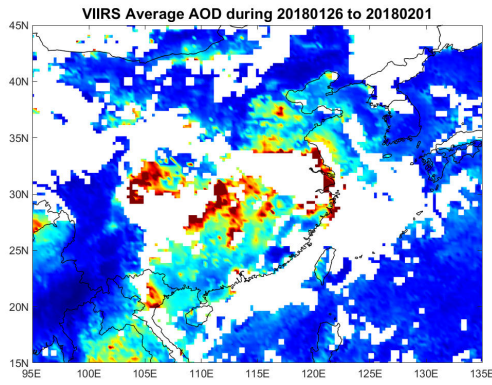

b

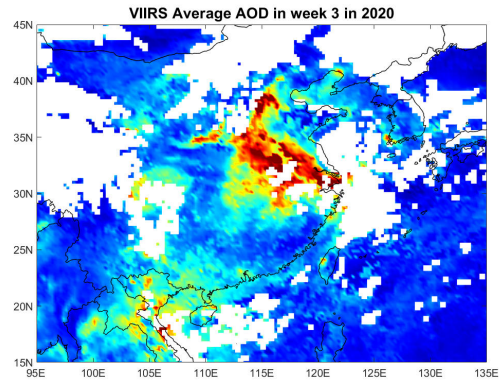

Fig. S4: Average VIIRS AOD in the days preceding the a) 02/01/2018 LRT event and the b) 2020 CNY Week 3 LRT event arriving to Taiwan
